# Supplementary material
Source: PubMed Central journal article supplement (PMC7870543)

**Motif 4 (Up)**P-value:  $2.7 \times 10^{-16}$ 

Occ: 2.4% vs. 0.5%

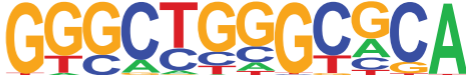**Motif 5 (Up)**P-value:  $7.3 \times 10^{-16}$ 

Occ: 3.9% vs. 1.3%

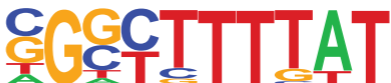**Motif 6 (Up)**P-value:  $1.3 \times 10^{-14}$ 

Occ: 7.5% vs. 3.6%

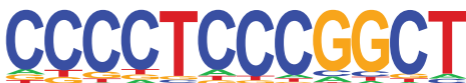**Motif 7 (Up)**P-value:  $6.5 \times 10^{-14}$ 

Occ: 1.6% vs. 0.3%

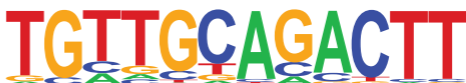**Motif 8 (Up)**P-value:  $1.3 \times 10^{-13}$ 

Occ: 1.1% vs. 0.1%

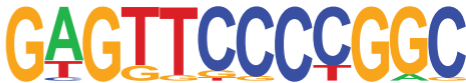**Motif 9 (Up)**P-value:  $1.4 \times 10^{-13}$ 

Occ: 0.6% vs. 0.01%

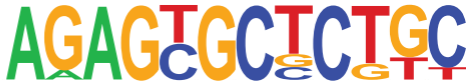**Motif 10 (Up)**P-value:  $1.5 \times 10^{-13}$ 

Occ: 1.0% vs. 0.1%

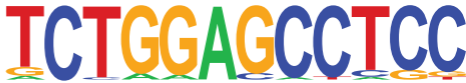**Motif 1 (Down)**P-value:  $1.0 \times 10^{-13}$ 

Occ: 1.40% vs. 0.2%

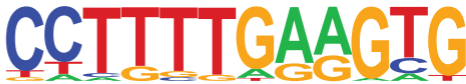**Motif 2 (Down)**P-value:  $2.4 \times 10^{-13}$ 

Occ: 1.5% vs. 0.2%

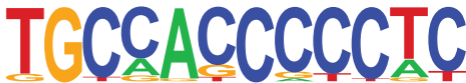

Supplement: NIHMS1649733-supplement-mmc3.pdf [file NIHMS1649733-supplement-mmc3.pdf]
