# Supplementary material
Source: PubMed Central journal article supplement (PMC7870543)

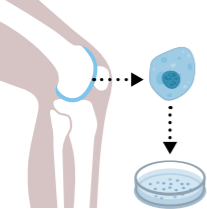

**Isolation**

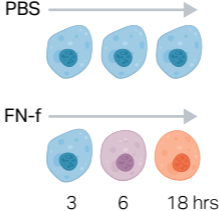

**Treatment**

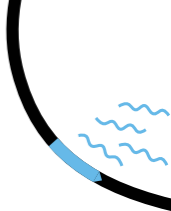

**RNA-seq**

Supplement: NIHMS1649733-supplement-mmc1.pdf [file NIHMS1649733-supplement-mmc1.pdf]

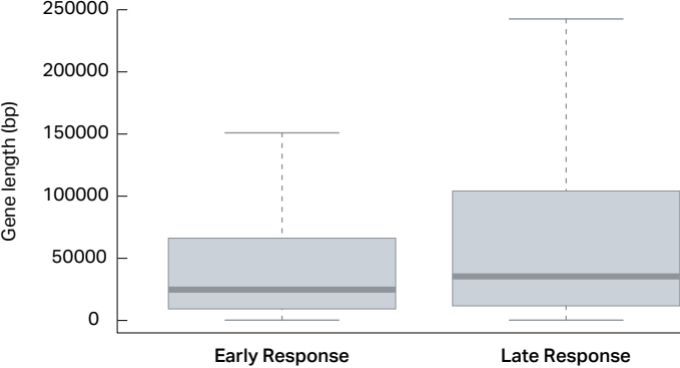

Supplement: NIHMS1649733-supplement-mmc2.pdf [file NIHMS1649733-supplement-mmc2.pdf]
